# Supplementary material
Source: PubMed Central journal article supplement (PMC2655307)
Supplement: NIHMS91852-supplement-1_Legends.pdf [file NIHMS91852-supplement-1_Legends.pdf]

## Supplemental Figures

### Supplemental Figure 1. *Staining of neutrophils in lesional psoriatic skin.*

Neutrophils were stained in paraffin sections of skin from patients with psoriasis with an antibody against myeloperoxidase. Sections stained with control IgG are displayed in the upper right corner.

### Supplemental Figure 2. *Expression of cathelicidin and IL-8 in NHEK after stimulation with IFN- $\gamma$ , TNF- $\alpha$ and 1,25D3.*

Primary keratinocytes were treated with or without 1,25D3 ( $10^{-8}$  M), IFN- $\gamma$  (10 ng/ml), TNF- $\alpha$  (20 ng/ml) or their combinations. Cells were harvested 24 h after stimulation and cathelicidin and IL-8 transcript abundance was analyzed by qPCR. Data are means  $\pm$  SD of a single experiment performed in triplicate and are representative of 3 independent experiments.

### Supplemental Figure 3. *Mechanism of IL-17A increased cathelicidin in NHEK.*

To investigate the mechanism of IL-17A increased cathelicidin, CYP27B1 expression, the concentration of 1,25D3 in cell culture supernatants and histone H4 acetylation were analyzed in NHEK after stimulation with IL-17A (10 ng/ml) and/or 1,25D3 ( $10^{-8}$  M). Cells were harvested 24 h after stimulation and analyzed for CYP27B1 mRNA by qPCR (**A**; left panel) or 1,25D3 levels by ELISA (**A**; right panel). (**B**) Western blot analysis of histone H4 acetylation. Cells treated with the histone-deacetylase inhibitor butyrate (2 mM) served as positive controls. (**C**) A 1500 bp fragment of the 5' UTR of the human cathelicidin gene CAMP was cloned into a luciferase reporter plasmid as previously described (12) and transfected into HaCaT keratinocytes. Cells were stimulated with 1,25D3 ( $10^{-10}$  M or  $10^{-8}$  M) and/or IL-17A (10 ng/ml) and luciferase activity was assayed. Values represent the ratio between pGL-3-1500 and pGL-3-basic (empty vector) activities in each sample. (**D**) NHEK were grown in medium containing low (0.06 mM) or high calcium (1.7 mM). Transcript abundance of the vitamin D receptor (VDR) and the IL-17A receptor (IL-17RA) were analyzed by qPCR. Data are means  $\pm$  SD of a single experiment performed in triplicate and are representative of 3 independent experiments.
